# Supplementary material
Source: PubMed Central journal article supplement (PMC2864714)

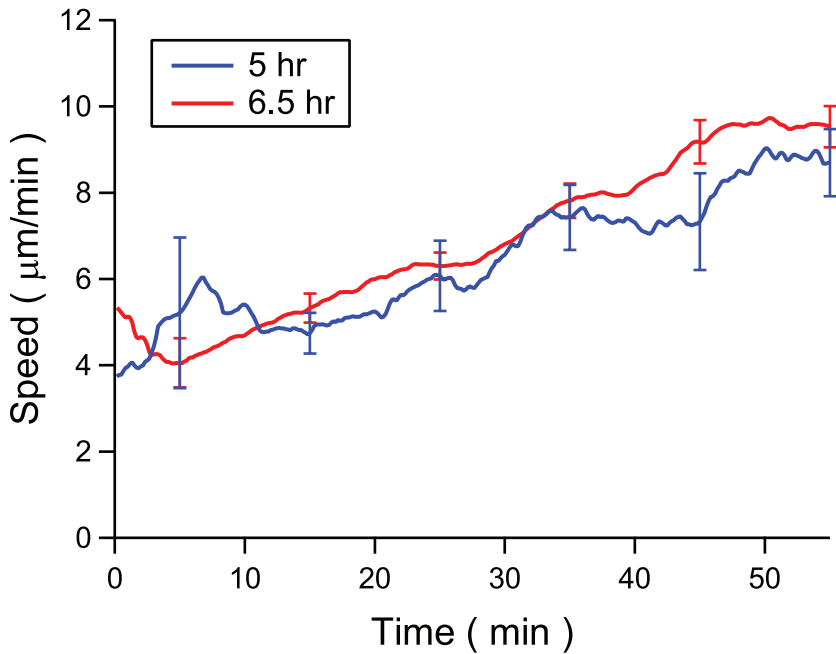

Supplement: supp_123_10_1724__2.pdf [file supp_123_10_1724__2.pdf]
